# Supplementary material
Source: Hindawi journal article supplement (doi:10.1155/2011/729478)
Supplement: f3 [file 729478.f3.pdf]

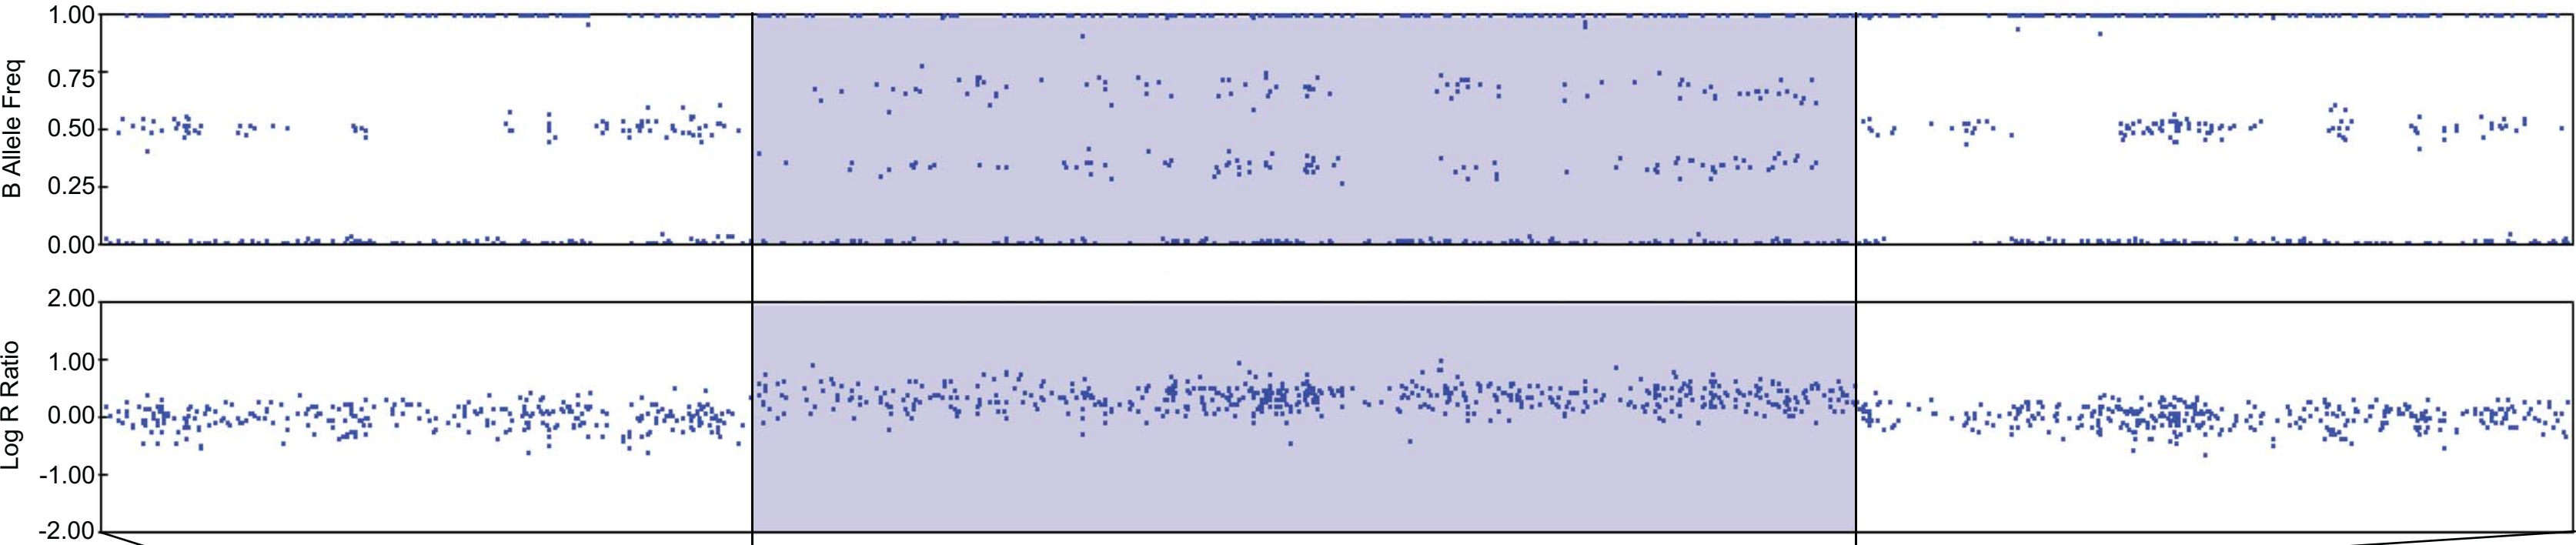

11

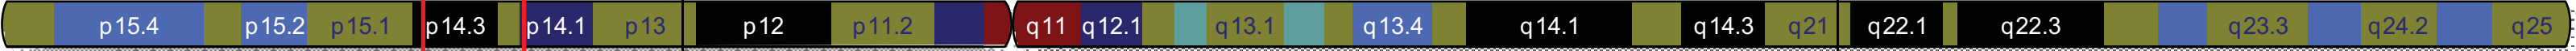

Base Position

22,744,000

23,272,000

23,800,000

24,328,000

24,856,000

25,384,000

25,912,000

26,440,000

26,968,000

27,490,000

Cytogenetic Band  
Sequence (+)

p14.3

p14.2

p14.1

No sequence data file found for this chromosome.

ANO5 | FANCF  
ANO5 |>|>|>|> GAS2  
SLC17A6 |>|>|>|> GAS2  
|>|>|>|> GAS2  
|>|>|>|> SVIP

LUZP2

ANO3 | FIBIN |>|>|>|> CCD  
MUC15 |>|>|>|> BBOX1 |>|>|>|> CCD  
MUC15 |>|>|>|> CCD  
MUC15 |>|>|>|> CCD  
SLC5A12 |>|>|>|> CCD
