# Supplementary material
Source: Hindawi journal article supplement (doi:10.1155/2011/729478)

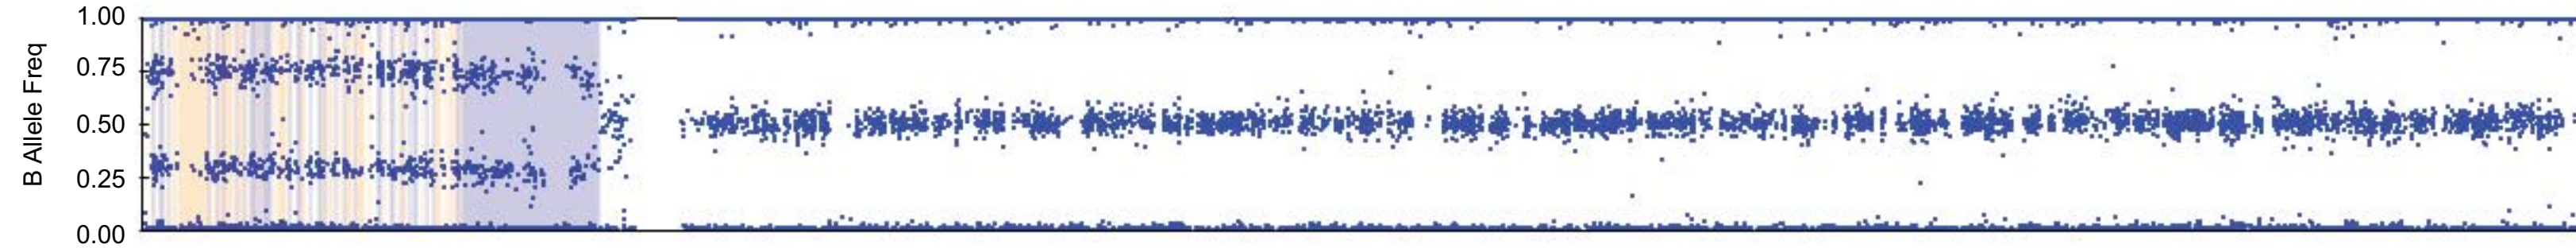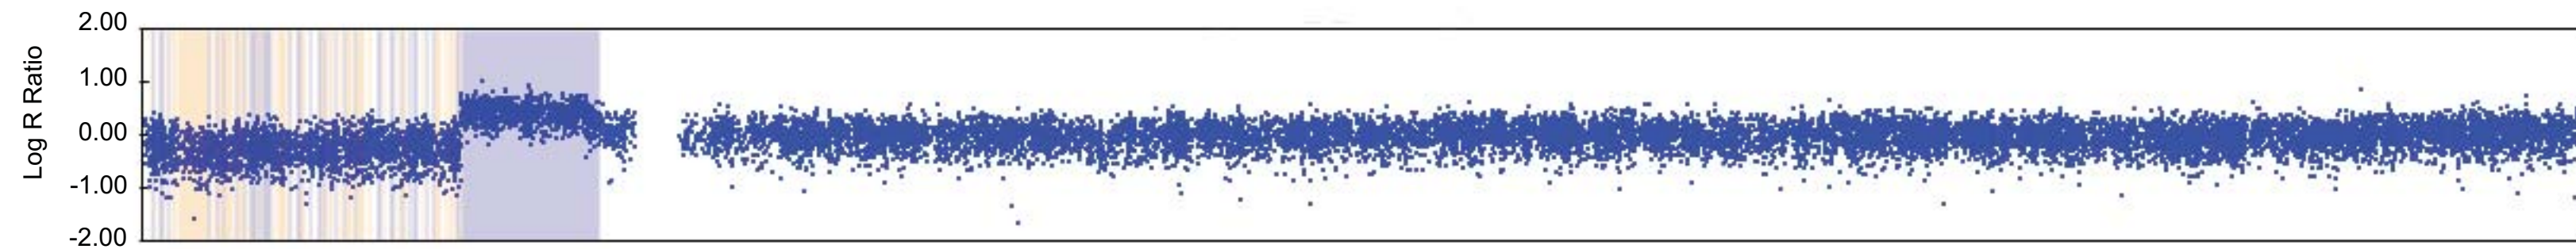

18

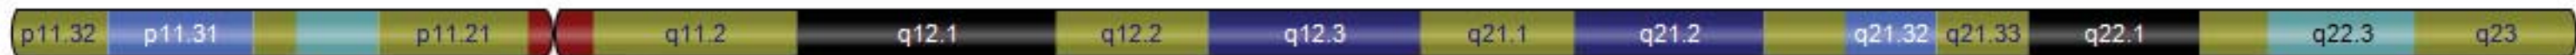

Supplement: f1 [file 729478.f1.pdf]

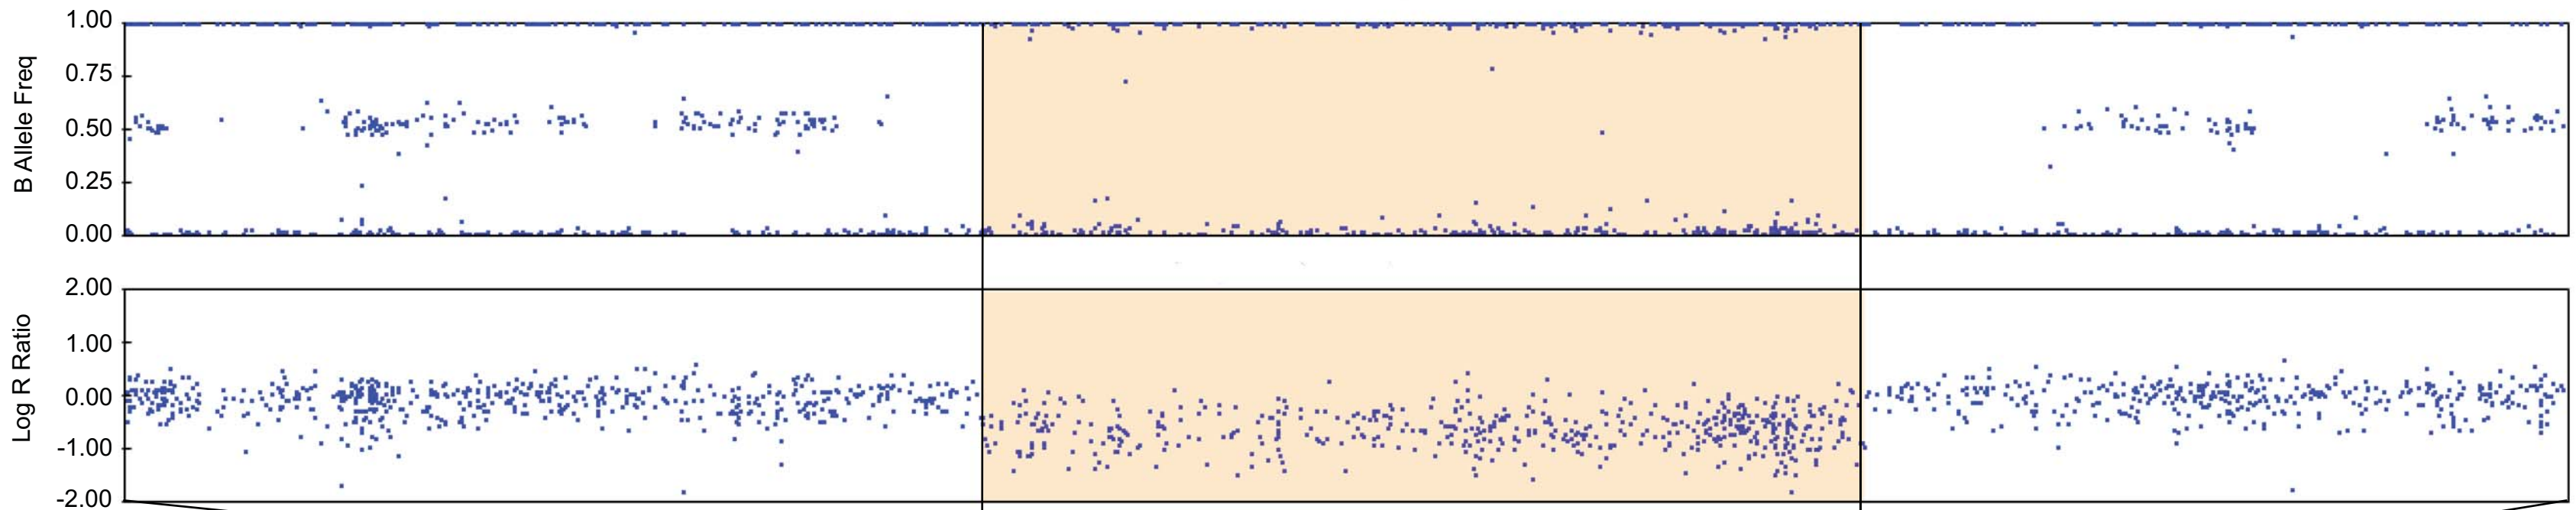

4

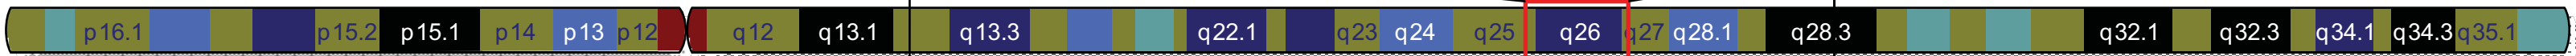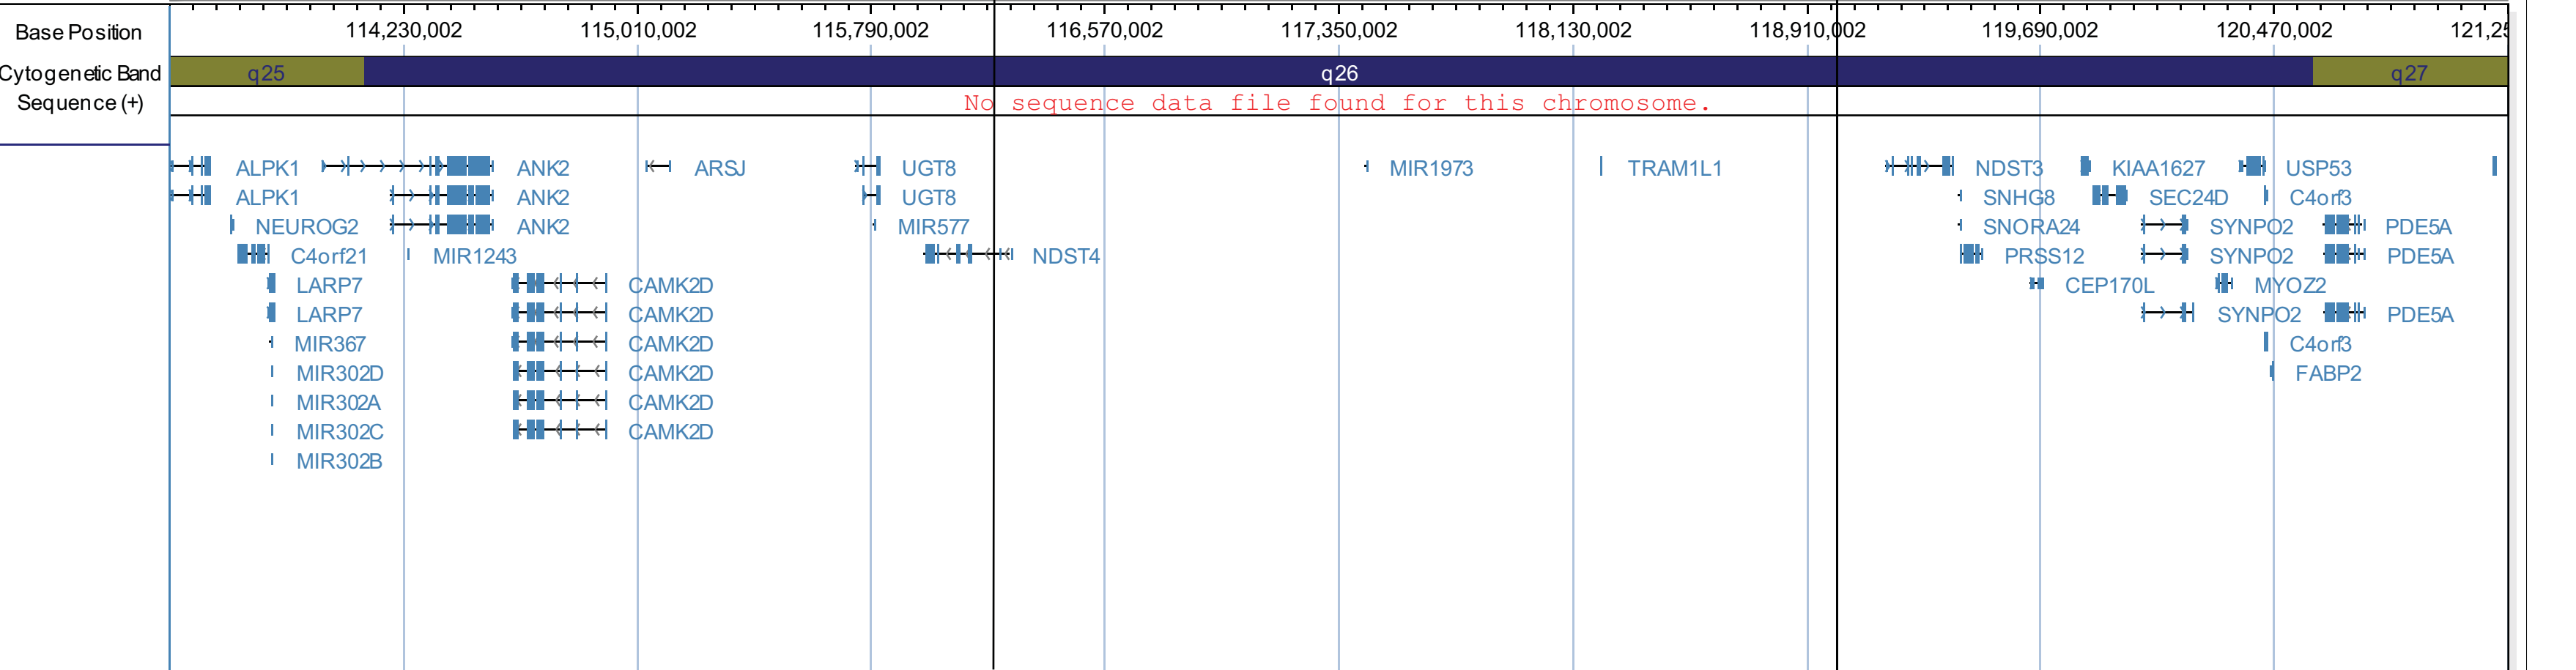

Supplement: f2 [file 729478.f2.pdf]
